# Supplementary material
Source: publisher figshare collection journal article supplement (https://karger.figshare.com/ndownloader/files/21887043)
Supplement: Supplementary file 1 [file 21887043]

|  | **None** | **Benign** | **Moderate** | **Severe** |
| --- | --- | --- | --- | --- |
| **Thrombocytopenia** - (thrombocytes in G/L) | >150 | < 150 | < 100 | <50 |
| **Hypothermia** - (body temperature in °C) | >35 | 32-35 | 28-32 | <28 |
| **Metabolic acidosis** - (pH and base excess) | pH = 7.35;7.45 and BE = -2;2 | pH < 7.30 and/or BE = -2;-4 | pH < 7.25 and/or BE = -4;-6 | pH < 7.20 and/or BE < -6 |
| **Metabolic alkalosis** - (pH and base excess) | pH = 7.35;7.45 and BE = -2;2 | pH > 7.5 and/or BE = 2;4 | pH > 7.55 and/or BE = 4;6 | pH > 7.60 and/or BE > 6 |
| **Hypernatremia** - (plasma sodium level in mmol/L) | <145 | >145 | >152 | >160 |
| **Hypocalcemia** - (arterial ionized calcium level in mmol/L) | >1.05 | <1.05 | <0.95 | <0.85 |
|  |  |  |  |  |
|  | **None** | **Suspected** |  |  |
| **Citrate intoxication** - (calcium ionized over total calcium ratio) | < 2.5 | >2.5 | / | / |

**Supplementary table 1 : Definitions of all complications recorded for CRRT sessions with a lifespan longer than 6 hours**
